# Supplementary material for: Disrupted circadian clocks and altered tissue mechanics in primary human breast tumours
Source: PubMed Central journal article supplement (PMC6198506; doi:10.1186/s13058-018-1053-4), 2018-10-22

Normal

Tumour

Patient-3

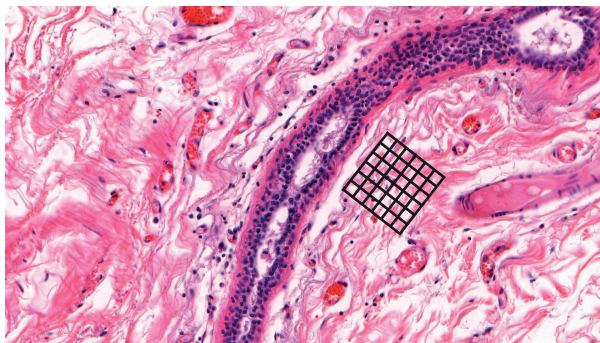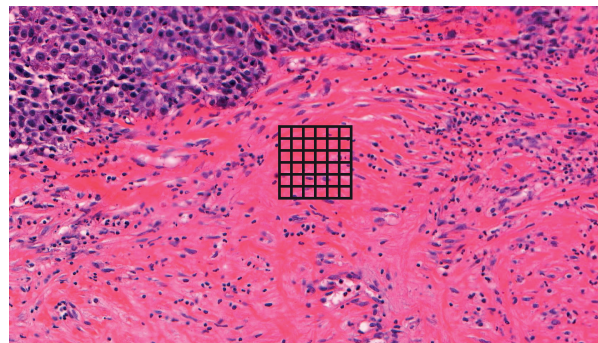

Patient-4

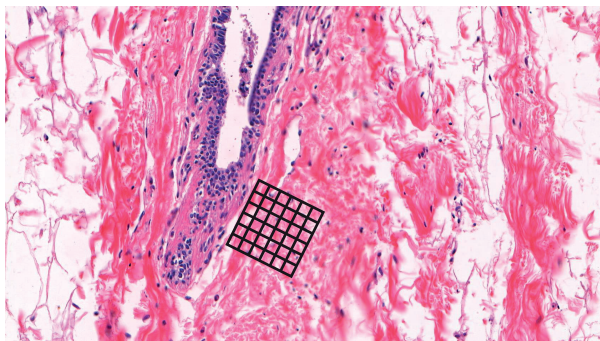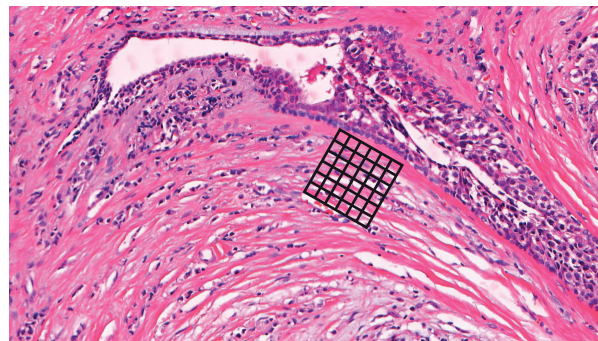

Patient-6

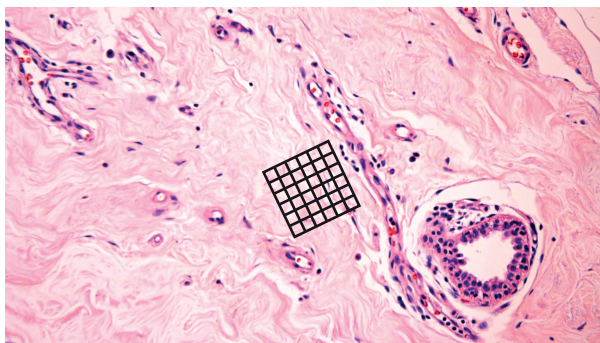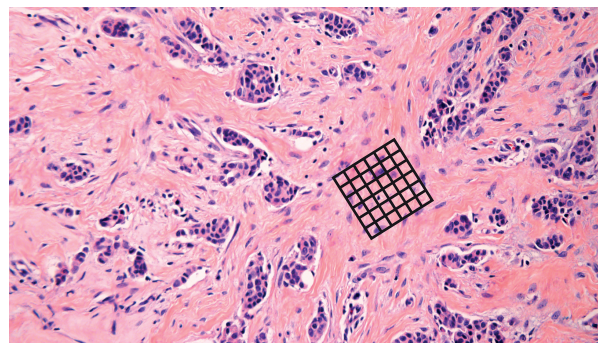

Patient-7

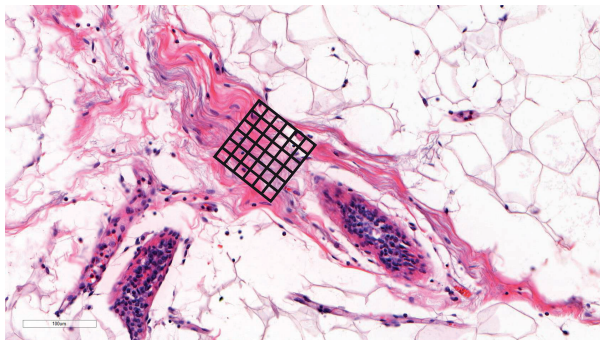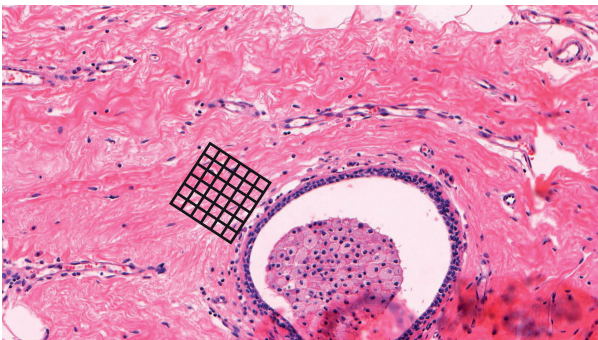

Patient-8

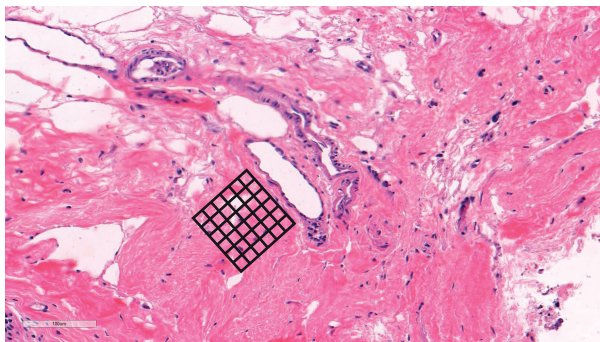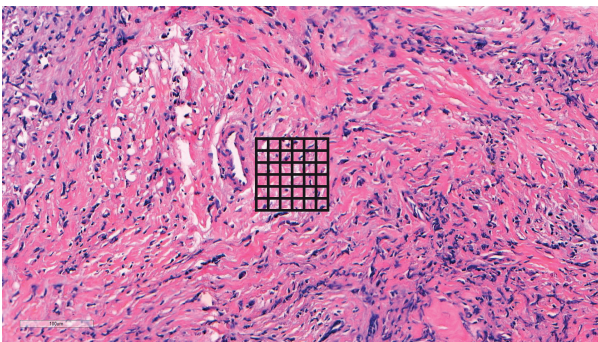

Supplement: 13058_2018_1053_MOESM6_ESM.pdf [file 13058_2018_1053_MOESM6_ESM.pdf]
